# Supplementary material for: Cell-free DNA maps COVID-19 tissue injury and risk of death and can cause tissue injury
Source: PubMed Central journal article supplement (PMC8119224; doi:10.1172/jci.insight.147610), 2021-04-08
Supplement: jciinsight-6-147610-s260.pdf [file jciinsight-6-147610-s260.pdf]

# Supplementary Material

## **Cell-free DNA maps COVID-19 tissue injury and risk of death, and propagates tissue injury**

Temesgen E. Andargie<sup>#,1,2</sup>, Naoko Tsuji<sup>#,3</sup>, Fayaz Seifuddin<sup>4</sup>, Moon Kyoo Jang<sup>1</sup>, Peter S.T. Yuen<sup>3</sup>, Hyesik Kong<sup>1</sup>, Ilker Tunc<sup>4</sup>, Komudi Singh<sup>4</sup>, Ananth Charya<sup>1</sup>, Steven Nathan<sup>5</sup>, Andrea Cox<sup>6</sup>, Mehdi Pirooznia<sup>4</sup>, Robert A. Star<sup>3</sup>, Sean Agbor-Enoh<sup>\*,1,6</sup>

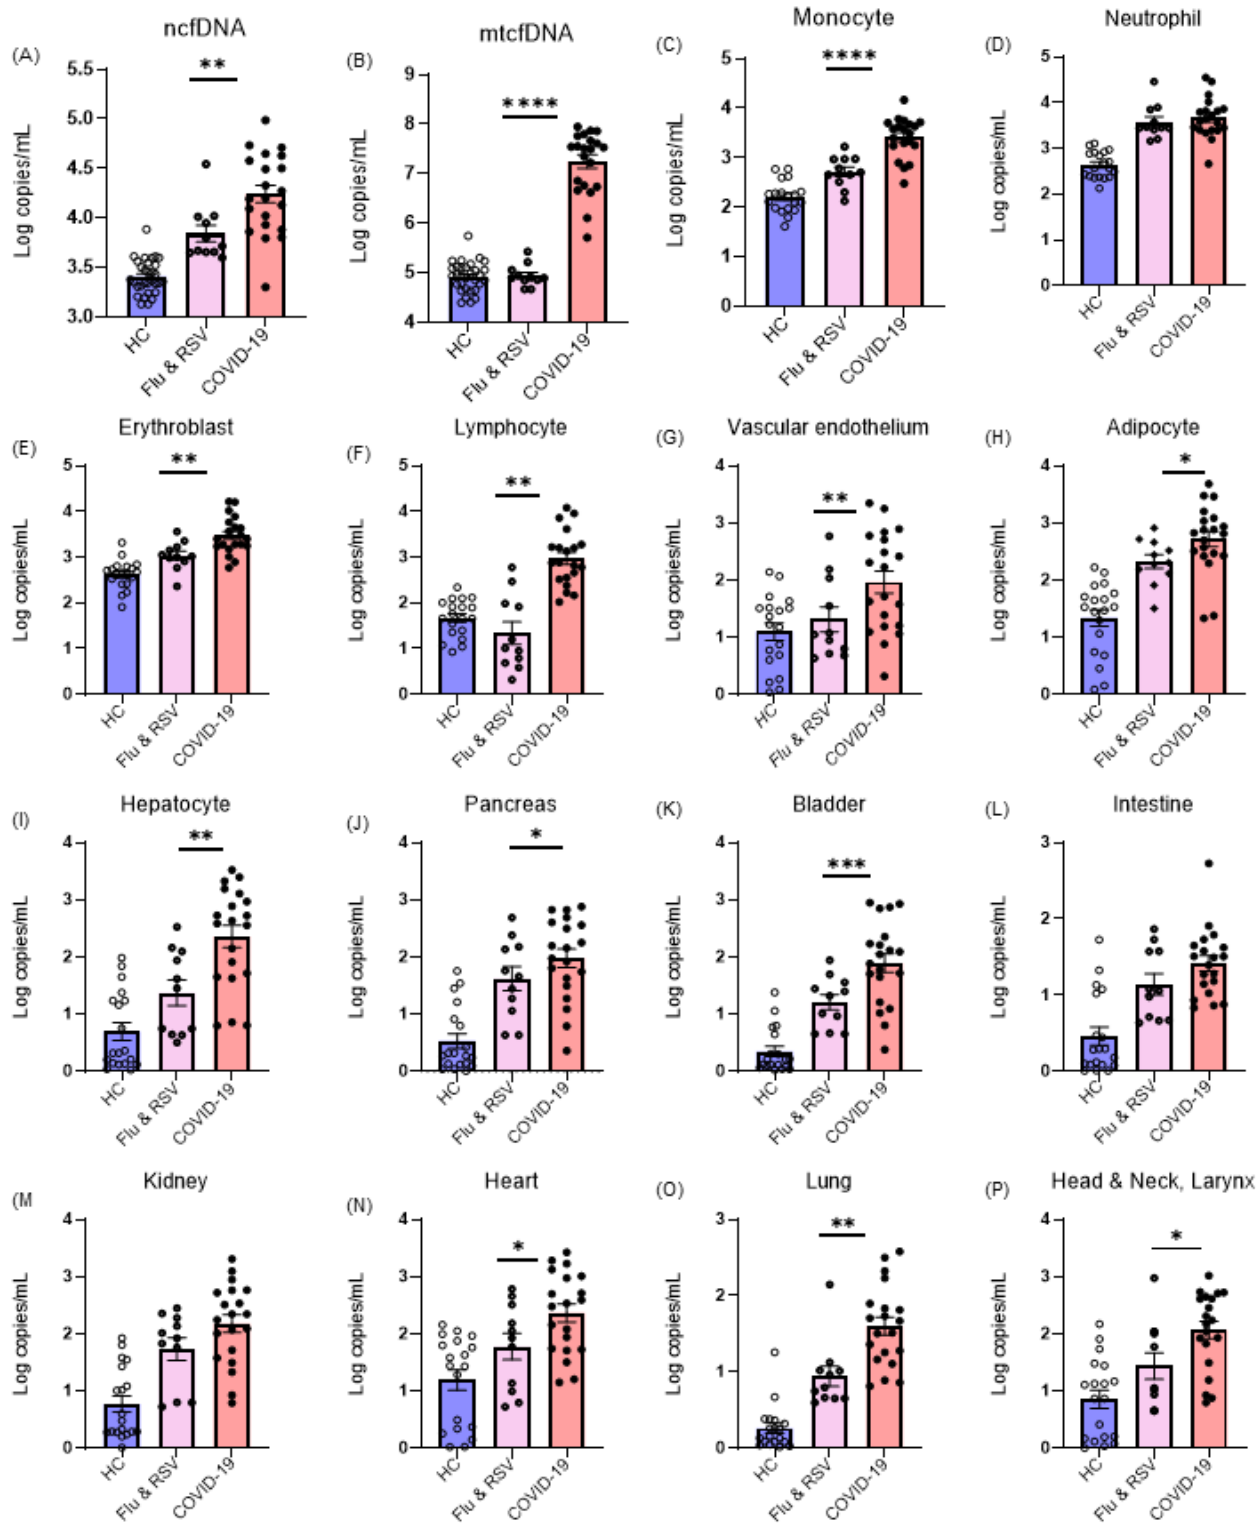

**Supplementary Figure 1.** cfDNA profiles in COVID-19 patients compared with WHO-scale-matched Flu & RSV patients.

Total plasma cell-free nuclear (A) and mitochondrial cfDNA (B) from Healthy controls, blue (n=31), hospitalized non-ICU Influenza and Respiratory Syncytial Virus (Flu & RSV) infected patients, orange (n=12), and hospitalized non-ICU COVID-19 patients, black (n= 20). (C-P) quantification of cell/tissue-specific cfDNA; (C) Monocytes, (D) Neutrophils, (E) Erythroblasts, (F) Lymphocytes, (G) Vascular endothelial cells, (H) adipocytes, (I) Hepatocytes, (J) Pancreas, (K) Bladder, (L) intestine, (M) Kidney, (N) Heart, (O) Lung and (P) Head and neck larynx-derived cfDNA from HCs, brown (n=19), Flu & RSV patients, yellow (n=12), and COVID-19 patients, red (n=20). Statistical significances were determined by unpaired 2-sided student's t-test. Bar graphs expressed as mean  $\pm$  standard error of the mean (SEM). P-values less than 0.05 were considered statistically significant; \*p < 0.05, \*\*p < 0.01, \*\*\*p < 0.001, and \*\*\*\*p < 0.0001.

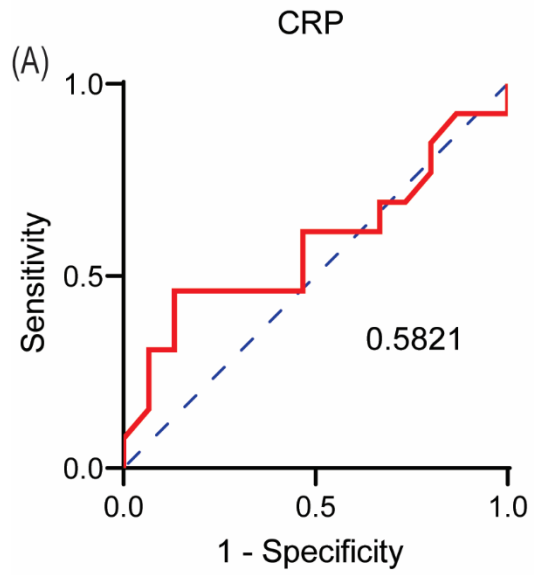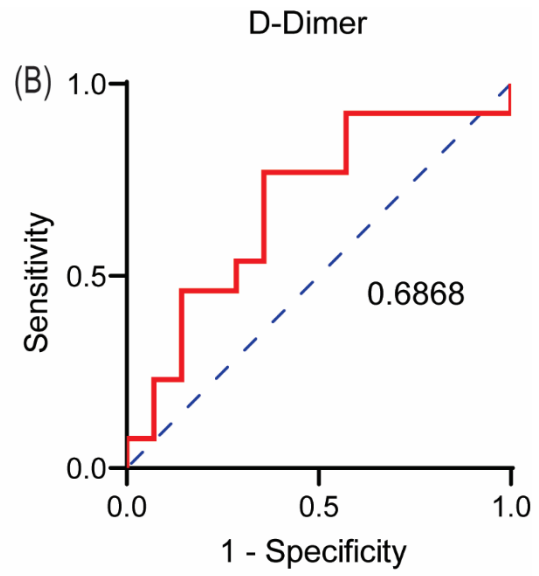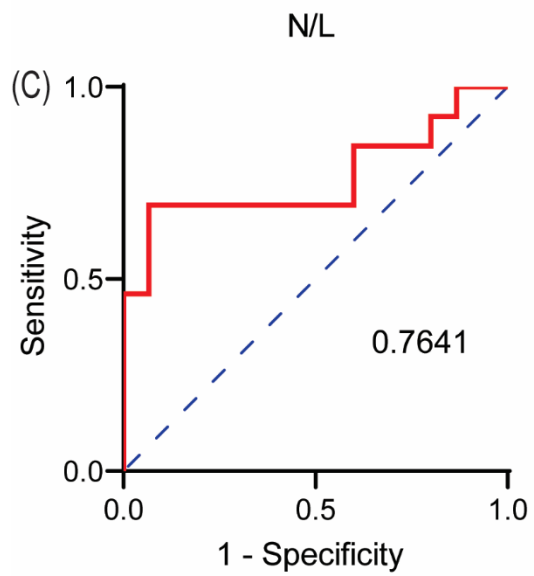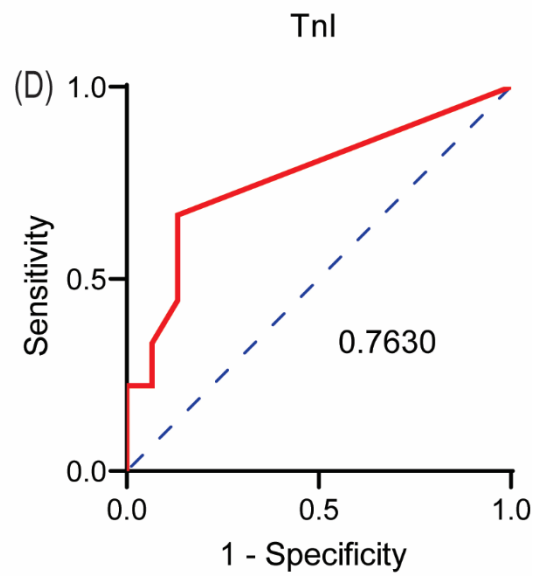

**Supplementary Figure 2.** ROC analysis showing performance traditional inflammatory markers to identify hospitalised patients who subsequently require ICU versus who did not: A) CRP, (B) D-Dimer, (C) Neutrophil to Lymphocyte ration (N/L) and (D) Troponin.

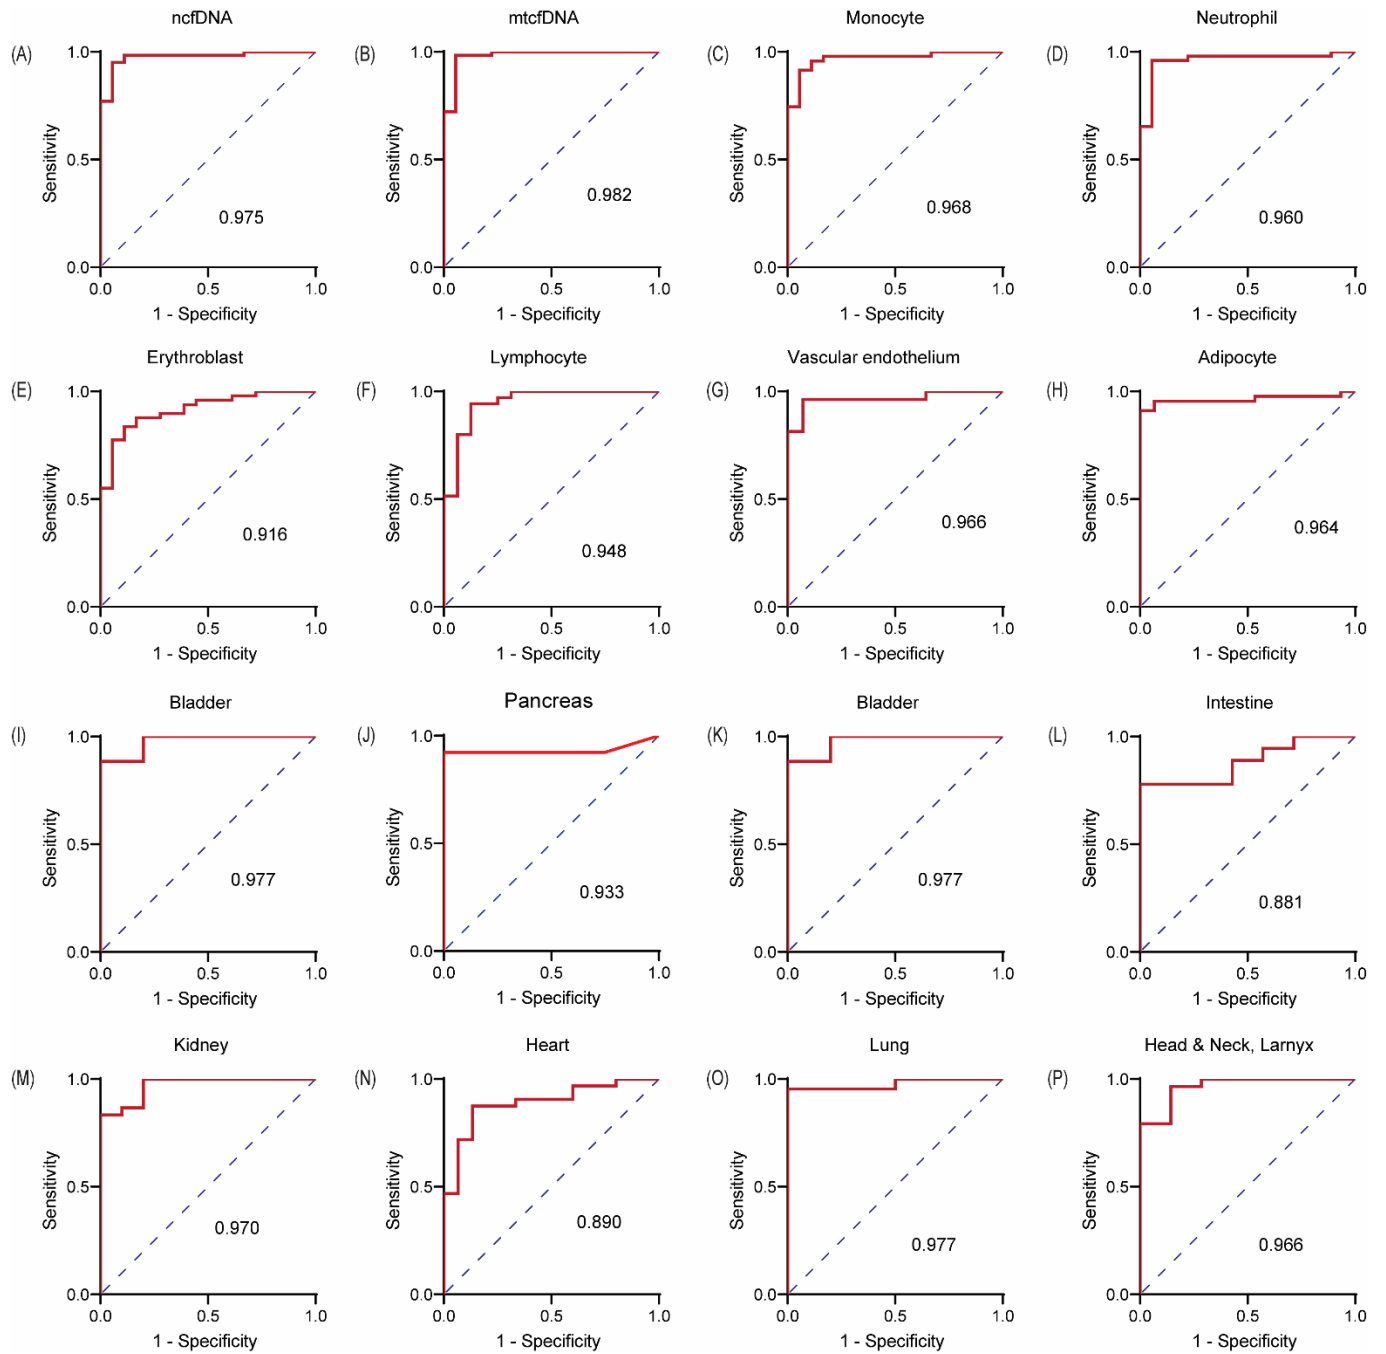

**Supplementary Figure 3.** ROC analysis testing the performance of cfDNA to distinguished hospitalized patients from patients with mild COVID-19 not requiring hospitalization: (A)ncfDNA, (B) mtcfDNA , (C) Monocyte-, (D) Neutrophil-, (E) Erythroblast-, (F) Lymphocytes, (G) Vascular endothelium- (H) adipocyte-, (I) Hepatocyte-, (J) Pancreas, (K) Bladder-, (L) intestine-, (M) Kidney-, (N) Heart-, (O) Lung- and (P) Head and neck larynx-derived cfDNA.

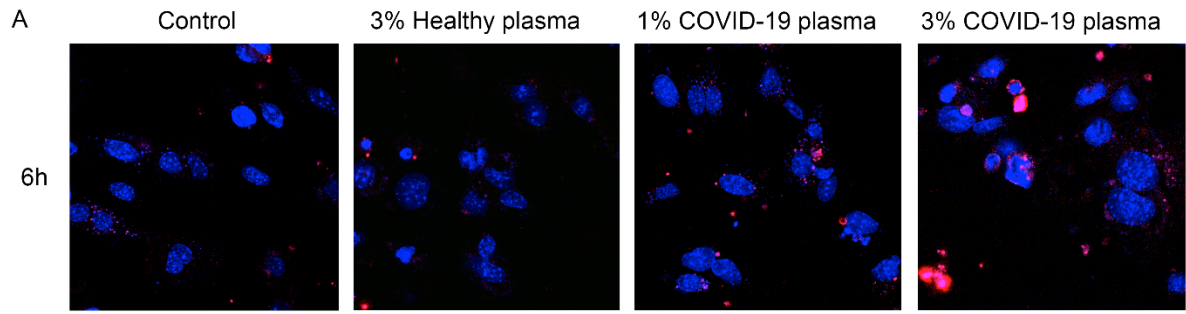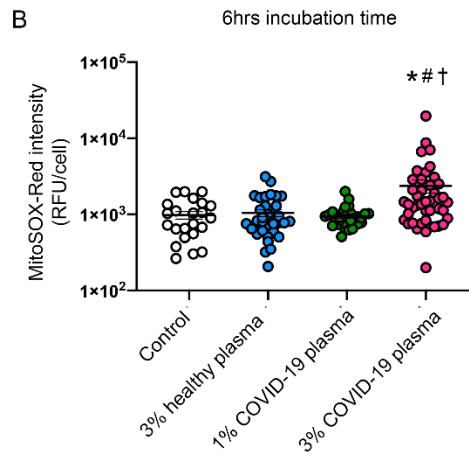



**Supplementary Figure 4.** Mitochondrial reactive oxygen species (mtROS) in mouse primary proximal tubular cells (mPPTCs) treated with COVID-19 patient B plasma of day 1.

(A) Representative images of mitochondrial superoxide, as detected by MitoSOX-Red staining and visualized under confocal microscopy. mPPTCs were untreated (control) or treated with 3% healthy volunteer plasma, 1% or 3% COVID-19 patient plasma after 6 hours of incubation. Red: MitoSOX-Red representing mitochondrial superoxide, blue: Hoechst3342 representing nuclei. Original magnification: x400. (B) MitoSOX-Red intensity in mPPTCs (n=23-44 cells from 3-5 fields/group) of each group after 6 hours of incubation. The bar in plots are expressed as mean  $\pm$  standard error of the mean (SEM). Statistical significance was determined using Tukey's multiple comparison after two-way ANOVA. P-values less than 0.05 were considered statistically significant; \*p<0.05: vs control, #p<0.05: vs 3% healthy plasma, †p<0.05: vs 1% COVID-19 plasma.

Supplementary Table 1. Demographic and clinical data's of Flu and RSV patients.

|                         | Influenza (n=16) | RSV (n=9)    | RSV and Influenza combined (n=21) |
|-------------------------|------------------|--------------|-----------------------------------|
| Sex                     |                  |              |                                   |
| Male (%)                | 9 (43.8)         | 2 (22.2)     | 11 (52.4)                         |
| Female (%)              | 7 (56.3)         | 7 (77.8)     | 10 (47.6)                         |
| Median Age (years)(IQR) | 55 (25.75-62)    | 53 (31-61.5) | 56 (31-62)                        |
| Race                    |                  |              |                                   |
| White                   | 14 (87.5)        | 7 (77.8)     | 18 (85.7)                         |
| Black                   | 2 (12.5)         | 2 (22.2)     | 3 (14.3)                          |
| Mean BMI (SE)           | 26.9 (1.4)       | 27.5 (0.8)   | 27.0 (0.95)                       |
| Obesity (%)             | 1 (7.7)          | 0 (0)        | 1 (5.9)                           |
| Hypertension (%)        | 6 (42.9)         | 3 (37.5)     | 8 (44.4)                          |
| Diabetes (%)            | 7 (50)           | 4 (50)       | 9 (50)                            |
| Coronary Artery Disease | 2 (16.7)         | 1 (12.5)     | 3 (18.8)                          |
| Heart Failure           | 1 (9.1)          | 1 (12.5)     | 2 (13.3)                          |

Supplementary Table 2. Multivariable Analysis of Nuclear cell-free DNA and Outcome (deceased vs recovered)

| Variable             | Odds ratio | 95% Confidence Interval | p-value |
|----------------------|------------|-------------------------|---------|
| ncfDNA               | 13.3       | 2.2-82.1                | 0.0053  |
| Sex (Male vs Female) | 1.1        | 0.99-1.1                | 0.0731  |
| Age                  | 1.2        | 0.2-6.4                 | 0.8086  |
| Obesity (Yes vs No)  | 1.6        | 0.3-8.4                 | 0.6068  |
| Cancer (Yes vs No)   | 0.8        | 0.1-12.2                | 0.8692  |

ncfDNA: nuclear cell-free DNA

Supplementary Table 3. Adjusted t-test for multiple comparison using Hommel procedure.

| Figure Panel         | Outcome (Hospitalized Recovered vs. Deceased) |                  | Trajectories       |                   |                     |                  |                   |                     |
|----------------------|-----------------------------------------------|------------------|--------------------|-------------------|---------------------|------------------|-------------------|---------------------|
|                      | t-test, Unadjusted                            | t-test, Adjusted | t-test, Unadjusted |                   |                     | t-test, Adjusted |                   |                     |
|                      |                                               |                  | HC vs. Mild        | Mild vs. Moderate | Moderate vs. Severe | HC vs. Mild      | Mild vs. Moderate | Moderate vs. Severe |
| ncfDNA               | 1.08E-05                                      | 0                | 0.492024215        | 3.92E-08          | 3.08E-09            | 0.492            | 0                 | 0                   |
| mtcfDNA              | 0.529143322                                   | 0.5291           | 2.17E-06           | 2.91E-12          | 0.589810172         | 0                | 0                 | 0.5898              |
| Monocytes            | 0.034047696                                   | 0.034            | 0.001117393        | 1.46E-08          | 0.000242643         | 0.0011           | 0                 | 5.00E-04            |
| Neutrophils          | 0.001859509                                   | 0.0019           | 0.002194376        | 3.89E-06          | 1.08E-10            | 0.0022           | 0                 | 0                   |
| Erythroblast         | 0.018271506                                   | 0.0183           | 0.001281169        | 0.000216636       | 9.89E-06            | 0.0013           | 4.00E-04          | 0                   |
| Lymphocyte           | 0.790886224                                   | 0.7909           | 0.501921301        | 4.55E-06          | 0.830440885         | 0.8304           | 0                 | 0.8304              |
| Lung                 | 0.008952128                                   | 0.009            | 0.016324583        | 1.76E-08          | 2.49E-07            | 0.0163           | 0                 | 0                   |
| Heart                | 0.026058338                                   | 0.0261           | 0.052275097        | 0.023461693       | 0.005773749         | 0.0523           | 0.0469            | 0.0173              |
| Hepatocytes          | 0.046924027                                   | 0.0469           | 0.025306252        | 4.04E-05          | 0.012074128         | 0.0253           | 1.00E-04          | 0.0241              |
| Kidney               | 0.121531541                                   | 0.1215           | 0.470366462        | 1.50E-06          | 0.006715796         | 0.4704           | 0                 | 0.0134              |
| Adipocytes           | 0.008586377                                   | 0.0086           | 0.081170915        | 1.11E-05          | 0.000295646         | 0.0812           | 0                 | 6.00E-04            |
| Pancreas             | 0.014490903                                   | 0.0145           | 0.06668904         | 0.031891273       | 0.000765462         | 0.0633           | 0.0319            | 0.0023              |
| Vascular endothelium | 0.001881479                                   | 0.0019           | 0.051222829        | 5.73E-07          | 0.001610231         | 0.0512           | 0                 | 0.0032              |
| Bladder              | 0.015742999                                   | 0.0157           | 0.987042441        | 9.96E-09          | 0.002071943         | 0.987            | 0                 | 0.0041              |
| GIT                  | 0.056808039                                   | 0.0568           | 0.054544692        | 0.001345637       | 6.97E-09            | 0.0545           | 0.0027            | 0                   |
| Head & Neck, larynx  | 0.201998734                                   | 0.202            | 0.763553593        | 9.15E-06          | 0.005058013         | 0.7636           | 0                 | 0.0101              |
